# Supplementary material for: Thermocatalytic Decomposition of Methane: A Review on Carbon-Based Catalysts
Source: PubMed Central journal article supplement — ACS Omega. 2023 Aug 1;8(32):28945–67. doi: 10.1021/acsomega.3c01936 (PMC10433352; doi:10.1021/acsomega.3c01936), 2023-08-01
Supplement: ao3c01936_si_001.pdf [file ao3c01936_si_001.pdf]

# Thermocatalytic Decomposition of Methane: A Review on Carbon-Based Catalysts

Iqra R. Hamdani<sup>a</sup>, Adeel Ahmad<sup>a</sup>, Haleema M. Chulliyil<sup>a</sup>, Chandrasekar Srinivasakannan<sup>a,\*</sup>,  
Ahmed A. Shoaibi<sup>a</sup>, Mohammad M. Hossain<sup>b</sup>

\*Corresponding author. Tel: +971-23123310, Email- [srinivasa.chandrasekar@ku.ac.ae](mailto:srinivasa.chandrasekar@ku.ac.ae)

<sup>a</sup>Department of Chemical Engineering, Khalifa University of Science and Technology, Abu  
Dhabi, United Arab Emirates- 127788

<sup>b</sup>Department of Chemical Engineering, King Fahad University of Petroleum and Minerals,  
Dhahran-31261, Kingdom of Saudi Arabia

Table S1. Summary of recent ordered-mesoporous carbons used for methane decomposition studies in the literature.

| Catalyst | BET Surface area, m <sup>2</sup> g <sup>-1</sup> | Temperature, °C | Methane conversion | Hydrogen produced, mol. g cat <sup>-1</sup> | Reference |
|----------|--------------------------------------------------|-----------------|--------------------|---------------------------------------------|-----------|
| CMK-5    | 1940                                             | 1000            | NA                 | 0.95                                        | [1]       |
| CMK-3    | 1323                                             | 1000            | NA                 | 0.45                                        | [1]       |
| OMC      | 2154                                             | 850             | 28% to 5%          | 0.275                                       | [2]       |
| CMK-3    | 1400                                             | 950             | NA                 | 1.52                                        | [3]       |
| DUT-19   | 2420                                             | 950             | NA                 | 1.27                                        | [3]       |
| Ni/3DOMC | 884                                              | 850             | 58% to 50%         | NA                                          | [4]       |

CMK: carbon mesostructured by KAIST

OMC: ordered mesoporous carbon

DUT: carbide-derived carbon developed at Dresden University of Technology

3DOMC: three dimensionally ordered mesoporous carbon

Table S2. Initial CDM conversion rates of carbon obtained from various carbon sources, at 850°C [5].

| S.No. | Carbon type      | Source            | Initial CDM rate per unit mass, $K_m$ (T= 850°C)<br>(mmol/min.g) |
|-------|------------------|-------------------|------------------------------------------------------------------|
| 1.    | Activated carbon | Coconut shell, KE | 1.76                                                             |
| 2.    | Activated carbon | Hardwood          | 2.04                                                             |
| 3.    | Activated carbon | Lignite           | 1.77                                                             |
| 4.    | Activated carbon | Peat              | 1.63                                                             |
| 5.    | Activated carbon | Phenol, resin     | 1.66                                                             |
| 6.    | Activated carbon | Petroleum coke    | 1.43                                                             |
| 7.    | Glassy carbon    | -                 | 0.95                                                             |
| 8.    | Carbon black     | Black Pearls 120  | 0.22                                                             |
| 9.    | Graphite         | Natural           | 0.02                                                             |
| 10.   | Fullerene soot   | -                 | 1.9                                                              |

Table S3. Overview of filamentous carbons produced during the CDM reactions under different reaction conditions.

|                                                                                     |                                                                                                                                                                                                                                                                                                                                                                      |
|-------------------------------------------------------------------------------------|----------------------------------------------------------------------------------------------------------------------------------------------------------------------------------------------------------------------------------------------------------------------------------------------------------------------------------------------------------------------|
| 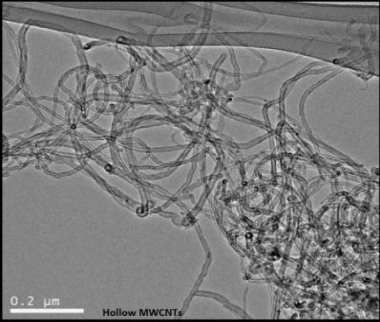 | <p>Reaction conditions: High temperature conditions</p> <ul style="list-style-type: none"> <li>• Carbon nucleation rate &gt; diffusion rate</li> <li>• Nucleation/precipitation near metal/gas interface</li> <li>• Examples: 3%Ru/AC, activated biochar.</li> </ul> <p>Hollow MWNTs, CNTs, and Carbon microtubes. Reprinted with copyright permission from [6].</p> |
|  | <p>Reaction conditions: Low temperature conditions</p> <ul style="list-style-type: none"> <li>• Carbon nucleation rate &lt; diffusion rate</li> <li>• Nucleation/precipitation near metal/support interface</li> <li>• Examples: 30%Fe/AC, K<sub>2</sub>CO<sub>3</sub>/CC (Coal char), 10%Fe/AC, 10%Ni/C (coal char)</li> </ul>                                      |

|                                                                                     |                                                                                                                                                                                                          |                    |               |
|-------------------------------------------------------------------------------------|----------------------------------------------------------------------------------------------------------------------------------------------------------------------------------------------------------|--------------------|---------------|
| Solid MWCNTs, CNFs. Reprinted with copyright permission from [7]                    |                                                                                                                                                                                                          |                    |               |
| 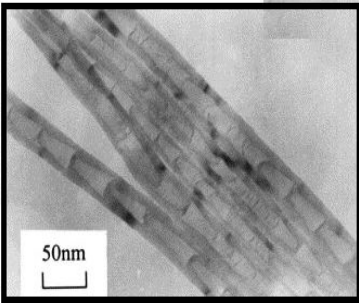   | Reaction conditions: High temperature conditions                                                                                                                                                         |                    |               |
|                                                                                     | <ul style="list-style-type: none"> <li>•</li> </ul> <p>in the feed + promoter</p> <ul style="list-style-type: none"> <li>•</li> </ul> <p>Cu/CNT.</p> <ul style="list-style-type: none"> <li>•</li> </ul> | Traces of hydrogen | Examples: Ni- |
| Bamboo- CNTs. Reprinted with copyright permission from [8].                         |                                                                                                                                                                                                          |                    |               |
|   | Reaction conditions: Low temperature conditions                                                                                                                                                          |                    |               |
|                                                                                     | <ul style="list-style-type: none"> <li>• Traces of hydrogen in feed</li> <li>• Comparatively larger particle sized metal catalysts under testing</li> <li>• Examples: 1%Ni/graphite</li> </ul>           |                    |               |
| Octopus tentacled CNFs. Reprinted with copyright permission from [9].               |                                                                                                                                                                                                          |                    |               |
|  | Reaction condition: very high temperature conditions (>800°C)                                                                                                                                            |                    |               |
|                                                                                     | <ul style="list-style-type: none"> <li>• Non-supported catalysts</li> <li>• Examples: Fe/graphite, Fe<sub>2</sub>O<sub>3</sub>/graphite</li> </ul>                                                       |                    |               |
| Nano-onions carbon deposits. Reprinted with copyright permission from [10]          |                                                                                                                                                                                                          |                    |               |

Table S4. Summary of few studies concerning the catalyst-regeneration techniques and the conclusions.

| Catalyst regeneration technique | Catalyst used | Conclusion | Reference |
|---------------------------------|---------------|------------|-----------|
|---------------------------------|---------------|------------|-----------|

|                                                                                                                                                 |                                                   |                                                                                                                                                                                                                                              |         |
|-------------------------------------------------------------------------------------------------------------------------------------------------|---------------------------------------------------|----------------------------------------------------------------------------------------------------------------------------------------------------------------------------------------------------------------------------------------------|---------|
| Pulsed or continuous introduction of oxidizing agents, such as air, CO <sub>2</sub> , and CO <sub>2</sub> under cyclic decomposition of methane | Carbon black, activated carbon, carbon nanofibers | A portion of the original catalyst was also gasified besides deposited carbon, rendering the process insufficient to retain the original activity of catalyst.                                                                               | [11,12] |
| Deep regeneration by chemical looping combustion (CLC) using H <sub>2</sub> O and O <sub>2</sub> as gasifying agents                            | Activated carbon                                  | More than 30% of spent catalyst could be recovered with heat generation that in turn would assist in methane decomposition.                                                                                                                  | [13]    |
| Simultaneous dosing of CO <sub>2</sub> and CH <sub>4</sub> as feedstock                                                                         | Activated carbon (pine wood biomass derived)      | Efficient regeneration with increased H <sub>2</sub> yield due to the simultaneous processes of carbon deposition, oxidation of deposit, decomposition of its structure by CO <sub>2</sub> , and partial oxidation of the original catalyst. | [14]    |
| Gasification of spent catalyst with steam and CO <sub>2</sub> mixture                                                                           | Activated carbon                                  | Increase in catalyst porosity and methane decomposition rate.                                                                                                                                                                                | [15]    |

## References:

- [1] D.P. Serrano, J.Á. Botas, P. Pizarro, R. Guil-López, G. Gómez, Ordered mesoporous carbons as highly active catalysts for hydrogen production by CH<sub>4</sub> decomposition, *Chemical Communications*. (2008) 6585–6587. <https://doi.org/10.1039/b811800k>.
- [2] H.Y. Wang, A.C. Lua, Hydrogen production by thermocatalytic methane decomposition, *Heat Transfer Engineering*, 34 (2013) 896–903. <https://doi.org/10.1080/01457632.2012.752682>.
- [3] V. Shilapuram, N. Ozalp, M. Oschatz, L. Borchardt, S. Kaskel, R. Lachance, Thermogravimetric analysis of activated carbons, ordered mesoporous carbide-derived carbons, and their deactivation kinetics of catalytic methane decomposition, *Ind Eng Chem Res.* 53 (2014) 1741–1753. <https://doi.org/10.1021/ie402195q>.
- [4] X. Yang, E. Yang, B. Hu, J. Yan, F. Shangguan, Q. Hao, H. Chen, J. Zhang, X. Ma, Nanofabrication of Ni-incorporated three-dimensional ordered mesoporous carbon for catalytic methane decomposition, *J Environ Chem Eng.* 10 (2022) 107451. <https://doi.org/10.1016/j.jece.2022.107451>.
- [5] N. Muradov, F. Smith, A. T-Raissi, Catalytic activity of carbons for methane decomposition reaction, in: *Catal Today*, 102-103 (2005) 225–233. <https://doi.org/10.1016/j.cattod.2005.02.018>.
- [6] K.Y. Lin, J.K. Chang, C.Y. Chen, W.T. Tsai, Effects of heat treatment on materials characteristics and hydrogen storage capability of multi-wall carbon nanotubes, *Diam Relat Mater.* 18 (2009) 553–556. <https://doi.org/10.1016/j.diamond.2008.07.018>.
- [7] A. Gamal, K. Eid, M.H. El-Naas, D. Kumar, A. Kumar, Catalytic methane decomposition to carbon nanostructures and CO<sub>x</sub>-free hydrogen: A mini-review, *Nanomaterials.* 11 (2021) 1226. <https://doi.org/10.3390/nano11051226>.
- [8] J. Chen, Y. Li, Y. Ma, Y. Qin, L. Chang, Formation of bamboo-shaped carbon filaments and dependence of their morphology on catalyst composition and reaction conditions, *Carbon.* 39 (2001) 1467-1475. [https://doi.org/10.1016/S0008-6223\(00\)00274-8](https://doi.org/10.1016/S0008-6223(00)00274-8).

- [9] C. Pham-Huu, R. Vieira, B. Louis, A. Carvalho, J. Amadou, T. Dintzer, M.J. Ledoux, About the octopus-like growth mechanism of carbon nanofibers over graphite supported nickel catalyst, *J Catal.* 240 (2006) 194–202. <https://doi.org/10.1016/j.jcat.2006.03.017>.
- [10] W. Zhang, L. Gao, M. Zhang, J. Cui, Y. Li, L. Gao, S. Zhang, Methane catalytic cracking to make hydrogen and graphitic nano carbons (nanotubes, microfibers, microballs, onions) with zero emission, *Synthesis and Reactivity in Inorganic, Metal-Organic and Nano-Metal Chemistry.* 44 (2014) 1166–1174. <https://doi.org/10.1080/15533174.2013.797452>.
- [11] J. Zhang, X. Li, H. Chen, M. Qi, G. Zhang, H. Hu, X. Ma, Hydrogen production by catalytic methane decomposition: Carbon materials as catalysts or catalyst supports, *Int J Hydrogen Energy.* 42 (2017) 19755–19775. <https://doi.org/10.1016/j.ijhydene.2017.06.197>.
- [12] U.P.M. Ashik, W.M.A. Wan Daud, H.F. Abbas, Production of greenhouse gas free hydrogen by thermocatalytic decomposition of methane - A review, *Renewable and Sustainable Energy Reviews.* 44 (2015) 221–256. <https://doi.org/10.1016/j.rser.2014.12.025>.
- [13] L. Yang, F. Liu, Y. Liu, W. Quan, J. He, Deep regeneration of activated carbon catalyst and autothermal analysis for chemical looping methane thermo-catalytic decomposition process, *Int J Hydrogen Energy.* 43 (2018) 17633–17642. <https://doi.org/10.1016/j.ijhydene.2018.07.202>.
- [14] Anna Adamska, Anna malaika, Mieczyslaw Kozlowski, Carbon-catalyzed decomposition of methane in the presence of carbon dioxide, *Energy & Fuels.* 24 (2010) 3307–3312.
- [15] N. Muradov, Hydrogen via methane decomposition: an application for decarbonization of fossil fuels, 26 (2001) 1165-1175. [https://doi.org/10.1016/S0360-3199\(01\)00073-8](https://doi.org/10.1016/S0360-3199(01)00073-8).
